# Supplementary material
Source: PubMed Central journal article supplement (PMC2771763)
Supplement: NIHMS140234-supplement-2.pdf [file NIHMS140234-supplement-2.pdf]

**Supplemental Table 2.** Number of tumors from each organ type. Samples indicated in bold font were amplified by WGA; the rest were amplified by LMP. If two different amplification schemes were used for the multiple tumor samples from the same organ, the number amplified by each method is indicated in parenthesis. One sample was collected for each of the tumors in the category "Other".

| <b>Patient</b> | Prostate | Lymph Node* | Liver    | Other                              | Total     |
|----------------|----------|-------------|----------|------------------------------------|-----------|
| 1              | 1        | 2           | 1        |                                    | 4         |
| 2              | <b>1</b> | 1           | <b>1</b> |                                    | 3         |
| 3              | 1        | 1           |          | skin , scrotum                     | 4         |
| 4              | 1        |             | 1        | lung                               | 3         |
| 5              | 1        |             | <b>1</b> | lung , <b>spleen</b>               | 4         |
| 6              | 2        | 2           |          |                                    | 4         |
| 7              | 1        | 2           |          | retroperitoneal , retromediastinal | 5         |
| 8              | 1        | <b>1</b>    | <b>1</b> |                                    | 3         |
| 9              | 1        | 1           |          |                                    | 2         |
| 10             |          | 4           | 1        | adrenal , spleen                   | 7         |
| 11             | 2 (1,1)  | 1           | 2 (1,1)  |                                    | 5         |
| 12             | 2 (1,1)  | 3 (1,2)     |          |                                    | 5         |
| 13             | 1        |             |          | iliac , peritoneum                 | 3         |
| 14             |          | 1           | <b>1</b> |                                    | 2         |
| Total          | 15       | 19          | 9        |                                    | <b>54</b> |

\*Metastases samples are from various lymphatic sites.
