# Supplementary material
Source: PubMed Central journal article supplement (PMC2771763)
Supplement: NIHMS140234-supplement-4.pdf [file NIHMS140234-supplement-4.pdf]

**Supplemental Table 4.** Genes with correlated array CGH and expressoin array results at a significance level of 0.05. The BAC clone used to interrogate the genomic region corresponding to the indicated gene is given. The start and end position for the BAC clone are indicated. The adjusted percent of CR tumors with losses and gains that encompass the gene is provided. Genes known to play a role in cancer are in bold. Androgen-regulated genes are underlined.

| <b>Gene Name</b>      | <b>Corr.</b> | <b>BAC clone</b> | <b>Chr</b> | <b>Start (Mbp)</b> | <b>End (Mbp)</b> | <b>%Gain</b> | <b>%Loss</b> |
|-----------------------|--------------|------------------|------------|--------------------|------------------|--------------|--------------|
| RGS7                  | 0.85         | RP11-80B9        | 1          | 237216929          | 237390563        | 30           | 8            |
| TRIM13                | 0.81         | RP11-34F20       | 13         | 49478678           | 49633565         | 8            | 74           |
| <b><u>TMPRSS2</u></b> | 0.79         | RP11-120C17      | 21         | 41630602           | 41780323         | 6            | 38           |
| WDR48                 | 0.78         | RP11-331G2       | 3          | 39135071           | 39311656         | 20           | 8            |
| GOLGA7                | 0.78         | RP11-282J24      | 8          | 41764757           | 41765007         | 38           | 24           |
| TMEM65                | 0.75         | RP11-158K1       | 8          | 125497282          | 125691169        | 76           | 0            |
| <b>TP53BP2</b>        | 0.74         | RP11-332L18      | 1          | 220241954          | 220431370        | 30           | 1            |
| ITM2B                 | 0.73         | RP11-305D15      | 13         | 47760579           | 47897921         | 6            | 79           |
| <u>PDHA1</u>          | 0.73         | RP11-91I18       | X          | 19000530           | 19177642         | 33           | 67           |
| KCNH8                 | 0.73         | RP11-444A4       | 3          | 19905910           | 20089026         | 26           | 4            |
| PYCR2                 | 0.73         | RP11-192M1       | 1          | 222516399          | 222516739        | 33           | 1            |
| EIF5                  | 0.73         | RP11-121H7       | 14         | 101461362          | 101461762        | 22           | 22           |
| TFDP2                 | 0.73         | RP11-372E1       | 3          | 144017129          | 144200229        | 20           | 4            |
| <b>PARP1</b>          | 0.71         | RP11-115P16      | 1          | 223100771          | 223281925        | 33           | 1            |
| MLLT11                | 0.71         | RP11-42A2        | 1          | 147889452          | 147893446        | 62           | 0            |
| MAPKAPK3              | 0.71         | RP11-804H8       | 3          | 50533656           | 50725980         | 6            | 23           |
| TMEM14C               | 0.71         | RP11-79C16       | 6          | 9462760            | 9646352          | 14           | 38           |
| KCNK17                | 0.70         | RP11-133J6       | 6          | 39247684           | 39433103         | 17           | 10           |
| <b>RAD21</b>          | 0.70         | RP11-89P19       | 8          | 119107247          | 119260516        | 78           | 0            |
| TCEB1                 | 0.70         | RP11-367E12      | 8          | 74911244           | 75077232         | 77           | 0            |
| NPC2                  | 0.70         | RP11-92H20       | 14         | 74381659           | 74551240         | 14           | 19           |
| TBX3                  | 0.70         | RP11-91M21       | 12         | 113284246          | 113455747        | 24           | 22           |
| TROVE2                | 0.70         | RP11-101E13      | 1          | 189674427          | 189822405        | 33           | 2            |
| TUG1                  | 0.70         | RP11-79G6        | 22         | 28896348           | 29079659         | 0            | 61           |
| C14orf118             | 0.69         | RP11-81O20       | 14         | 75620334           | 75793171         | 12           | 19           |
| C14orf94              | 0.69         | RP11-70F9        | 14         | 22278370           | 22443910         | 10           | 11           |
| TOMM20                | 0.68         | RP11-155C15      | 1          | 230927584          | 231057584        | 30           | 7            |
| NFIX                  | 0.68         | RP11-151O22      | 19         | 12850328           | 13005526         | 15           | 13           |
| SUPT16H               | 0.68         | RP11-84D12       | 14         | 20534815           | 20534929         | 10           | 11           |
| UBE2L3*               | 0.67         | RP11-36N5        | 22         | 20289397           | 20419397         | 4            | 52           |
| C6orf1                | 0.67         | RP11-513I15      | 6          | 34208416           | 34360244         | 23           | 7            |
| ZNF395                | 0.67         | RP11-116F9       | 8          | 28140630           | 28270630         | 13           | 63           |
| BCCIP                 | 0.67         | RP11-80I10       | 10         | 127832427          | 127985179        | 1            | 68           |
| B4GALT4               | 0.67         | RP11-190C22      | 3          | 120684353          | 120844091        | 21           | 11           |
| UBE2T                 | 0.66         | RP11-294K24      | 1          | 198817702          | 198985874        | 48           | 2            |
| CPSF1                 | 0.66         | RP11-91F24       | 8          | 145963320          | 146122245        | 71           | 2            |
| ZXDC                  | 0.66         | RP11-205A6       | 3          | 127354776          | 127484776        | 19           | 10           |
| C11orf71              | 0.66         | RP11-649M10      | 11         | 113637868          | 113816513        | 32           | 15           |
| TRAFD1                | 0.66         | RP11-90F3        | 12         | 111019769          | 111206853        | 19           | 21           |
| SRP9                  | 0.66         | RP11-192M1       | 1          | 222516399          | 222516739        | 33           | 1            |
| FBXO9                 | 0.66         | RP11-506E9       | 6          | 53088389           | 53171117         | 17           | 10           |
| VPS28                 | 0.65         | RP11-91F24       | 8          | 145963320          | 146122245        | 71           | 2            |
| PITRM1                | 0.65         | RP11-298E9       | 10         | 3131935            | 3295007          | 12           | 40           |
| XPR1                  | 0.65         | RP11-57D16       | 1          | 176568602          | 176725365        | 35           | 3            |
| HDLBP*                | 0.65         | RP11-475G3       | 2          | 241875812          | 242072725        | 6            | 31           |

|               |      |              |    |           |           |    |    |
|---------------|------|--------------|----|-----------|-----------|----|----|
| SAMM50        | 0.65 | RP11-116K16  | 22 | 42303034  | 42433034  | 7  | 46 |
| <b>RB1</b>    | 0.64 | RP11-305D15  | 13 | 47760579  | 47897921  | 6  | 79 |
| RNGTT         | 0.64 | RP11-52B15   | 6  | 89747264  | 89877264  | 12 | 43 |
| MEA1          | 0.64 | RP11-387M24  | 6  | 43123645  | 43253529  | 25 | 7  |
| ZNF76         | 0.64 | RP11-197P9   | 6  | 35173145  | 35303145  | 23 | 7  |
| ADNP          | 0.64 | RP11-5P14    | 20 | 48820372  | 48995030  | 14 | 0  |
| ILF2          | 0.64 | RP11-422P24  | 1  | 150704923 | 150880750 | 58 | 1  |
| <b>DEK</b>    | 0.63 | RP11-204B7   | 6  | 18145655  | 18315634  | 13 | 31 |
| <b>PBX1</b>   | 0.63 | RP11-403P14  | 1  | 161535853 | 161733335 | 49 | 7  |
| RNF146        | 0.63 | RP11-107M3   | 6  | 128778088 | 128908088 | 27 | 22 |
| PSME2         | 0.63 | RP11-256C2   | 14 | 23608219  | 23705612  | 3  | 26 |
| NDUFA9        | 0.63 | RP11-500M8   | 12 | 4485584   | 4674532   | 16 | 18 |
| PSMD11        | 0.63 | RP11-466A19  | 17 | 27772334  | 27941957  | 14 | 10 |
| NUCKS1        | 0.63 | RP11-131E5   | 1  | 202409146 | 202539071 | 54 | 5  |
| LAMP1         | 0.63 | RP11-98F14   | 13 | 112777671 | 112939870 | 25 | 42 |
| ARPC3         | 0.63 | RP11-237C13  | 12 | 109473086 | 109638318 | 21 | 18 |
| C6orf62       | 0.63 | RP11-145M23  | 6  | 24851393  | 24981393  | 16 | 24 |
| <b>MYCBP2</b> | 0.63 | RP11-137M6   | 13 | 76931003  | 77124101  | 7  | 60 |
| DDHD2         | 0.63 | RP11-513D5   | 8  | 38183042  | 38358846  | 31 | 43 |
| RNF6*         | 0.62 | CTD-2052F6   | 13 | 25738287  | 25885040  | 7  | 38 |
| OCIAD1        | 0.62 | RP11-217B22  | 4  | 48744131  | 48839424  | 19 | 10 |
| ABT1          | 0.62 | RP11-557F22  | 6  | 26151436  | 26356080  | 22 | 13 |
| TMEM14B       | 0.62 | RP11-79C16   | 6  | 9462760   | 9646352   | 14 | 38 |
| <u>SESN1</u>  | 0.62 | RP11-787I22  | 6  | 109354293 | 109484293 | 20 | 35 |
| TADA1L        | 0.62 | RP11-54B9    | 1  | 163348043 | 163508931 | 49 | 3  |
| AKT1          | 0.62 | CTC-200D12   | 14 | 106175185 | 106175506 | 22 | 22 |
| ST13          | 0.62 | RP11-1078O11 | 22 | 39813226  | 39980698  | 10 | 37 |
| <b>EXT1</b>   | 0.62 | RP11-89P19   | 8  | 119107247 | 119260516 | 78 | 0  |
| C1orf142      | 0.62 | RP11-520H14  | 1  | 224611903 | 224741903 | 33 | 1  |
| IDE           | 0.62 | RP11-56O17   | 10 | 94829347  | 94980209  | 1  | 66 |
| ZHX1          | 0.61 | RP11-158K1   | 8  | 125497282 | 125691169 | 76 | 0  |
| <u>HDGF</u>   | 0.61 | RP11-66D17   | 1  | 153434240 | 153594838 | 55 | 5  |
| GPAA1         | 0.61 | RP11-91F24   | 8  | 145963320 | 146122245 | 71 | 2  |
| ANAPC5        | 0.61 | RP11-665J20  | 12 | 119716714 | 119811260 | 28 | 9  |
| HOOK1         | 0.61 | RP11-459K13  | 1  | 59929893  | 60117072  | 20 | 28 |
| AGT*          | 0.61 | RP11-88N18   | 1  | 228034708 | 228191242 | 30 | 7  |
| ZHX2          | 0.61 | RP11-88J18   | 8  | 122259232 | 122437881 | 76 | 0  |
| YIPF3         | 0.61 | RP11-79I2    | 6  | 43435071  | 43619796  | 25 | 7  |
| PERP          | 0.61 | RP11-91G15   | 6  | 137329400 | 137498692 | 21 | 24 |
| UBB*          | 0.61 | RP11-273K13  | 17 | 15398209  | 15560308  | 2  | 46 |
| TPT1          | 0.61 | RP11-290D2   | 13 | 44666354  | 44827651  | 2  | 85 |
| TMEM11        | 0.61 | RP11-746M1   | 17 | 20819113  | 21055082  | 10 | 21 |
| RPSA          | 0.61 | RP11-331G2   | 3  | 39135071  | 39311656  | 20 | 8  |
| SCYL3         | 0.60 | RP11-184N12  | 1  | 166889029 | 167056094 | 40 | 3  |
| C1orf43       | 0.60 | RP11-205M9   | 1  | 150938154 | 151057614 | 58 | 1  |
| EIF2B2        | 0.60 | RP11-92H20   | 14 | 74381659  | 74551240  | 14 | 19 |
| FAM49B        | 0.60 | RP11-79E8    | 8  | 130828077 | 130999919 | 71 | 0  |
| DUSP22        | 0.60 | CTC-196I5    | 6  | 180642    | 180912    | 11 | 34 |
| ARID4B        | 0.60 | RP11-155C15  | 1  | 230927584 | 231057584 | 30 | 7  |
| SNRPE         | 0.60 | RP11-472I17  | 1  | 200331551 | 200461551 | 55 | 2  |
| CHUK          | 0.59 | RP11-316M21  | 10 | 101835645 | 102030561 | 1  | 66 |

|               |      |             |    |           |           |    |    |
|---------------|------|-------------|----|-----------|-----------|----|----|
| CD59          | 0.59 | RP11-102C11 | 11 | 33531085  | 33705184  | 17 | 17 |
| FNTA          | 0.59 | RP11-73M19  | 8  | 43102830  | 43270290  | 50 | 11 |
| FOXM1         | 0.59 | RP11-24N12  | 12 | 2977825   | 3145569   | 22 | 14 |
| C6orf89       | 0.59 | RP11-200O9  | 6  | 37222629  | 37397263  | 21 | 8  |
| MARK3         | 0.59 | RP11-121H7  | 14 | 101461362 | 101461762 | 22 | 22 |
| <u>USP10*</u> | 0.59 | RP11-80H6   | 16 | 83219109  | 83379313  | 7  | 71 |
| TTC33         | 0.59 | RP11-19F12  | 5  | 41237160  | 41386317  | 25 | 9  |
| AHSA1         | 0.58 | RP11-493G17 | 14 | 76749117  | 76959159  | 12 | 19 |
| ATG5          | 0.58 | RP11-79L7   | 6  | 106772705 | 106949084 | 20 | 36 |
| TMEM46        | 0.58 | CTD-2052F6  | 13 | 25738287  | 25885040  | 7  | 38 |
| MAP2K3        | 0.58 | RP11-64J19  | 17 | 21014521  | 21191548  | 10 | 21 |
| TUBB2B        | 0.58 | RP11-420G6  | 6  | 2641222   | 2815840   | 11 | 34 |
| <b>MUC1</b>   | 0.58 | CTD-2244D23 | 1  | 151921064 | 152051064 | 57 | 3  |
| PCDHGC3*      | 0.58 | RP11-15J20  | 5  | 140937170 | 141110789 | 26 | 20 |
| YIPF6         | 0.58 | RP11-451A4  | X  | 67961262  | 68112580  | 29 | 71 |
| HN1           | 0.58 | RP11-76G4   | 17 | 70695484  | 70882076  | 23 | 30 |
| TGS1          | 0.58 | RP11-22E14  | 8  | 57031738  | 57210594  | 67 | 0  |
| EIF4A1        | 0.58 | RP11-9A21   | 17 | 7411115   | 7541115   | 4  | 55 |
| HLTF          | 0.58 | RP11-464E15 | 3  | 150169183 | 150333259 | 24 | 4  |
| ENAH          | 0.58 | RP11-192M1  | 1  | 222516399 | 222516739 | 33 | 1  |
| ZNF292        | 0.58 | CTD-2090G18 | 6  | 87777456  | 87907456  | 14 | 41 |
| METTL3        | 0.57 | RP11-84D12  | 14 | 20534815  | 20534929  | 10 | 11 |
| BNIP3*        | 0.57 | RP11-45A17  | 10 | 133629567 | 133778458 | 17 | 59 |
| ECHS1*        | 0.57 | RP11-122K13 | 10 | 134947600 | 135111183 | 19 | 61 |
| TNFRSF11B     | 0.57 | RP11-89P19  | 8  | 119107247 | 119260516 | 78 | 0  |
| GNAL          | 0.57 | RP11-16A21  | 18 | 12586865  | 12587248  | 23 | 8  |
| UBE2N         | 0.57 | RP11-82I16  | 12 | 92401122  | 92401502  | 14 | 11 |
| ANKRD13A      | 0.57 | RP11-237C13 | 12 | 109473086 | 109638318 | 21 | 18 |
| EPRS          | 0.57 | RP11-211K12 | 1  | 215588846 | 215589140 | 29 | 1  |
| FAM48A        | 0.57 | RP11-91K18  | 13 | 35802749  | 35965115  | 0  | 63 |
| PEX7          | 0.57 | RP11-91G15  | 6  | 137329400 | 137498692 | 21 | 24 |
| SEC61A1       | 0.57 | RP11-427I6  | 3  | 128793305 | 128983062 | 19 | 6  |
| LSM1          | 0.57 | RP11-513D5  | 8  | 38183042  | 38358846  | 31 | 43 |
| CDK2AP2       | 0.57 | RP11-20K4   | 11 | 67021831  | 67228670  | 39 | 6  |
| SNW1          | 0.57 | RP11-63D17  | 14 | 77495925  | 77673059  | 12 | 19 |

Abbreviations: "Corr." = Correlation value, "Chr." = chromosome, "%Gain" = percent of tumors showing gain at chromosomal location, "%Loss" = percent of tumors showing loss at chromosomal location.

\*Genes also identified by GO analysis.
