# Supplementary material
Source: PubMed Central journal article supplement (PMC2771763)
Supplement: NIHMS140234-supplement-5.pdf [file NIHMS140234-supplement-5.pdf]

**Supplemental Table 5.** Genes with correlated copy-number and expression values that are significantly different between CR primaries and metastases. (A) Genes whose copy-number and expression levels are higher in CR metastases relative to primaries. (B) Genes whose copy-number and expression levels are higher in CR primaries relative to the metastases. The DNA, RNA, and combined score as described in the Methods are given. Androgen-regulated genes are in bold.

**A.**

| <b>Mets High/Primaries Low</b> |             |                 |                 | <b>FDR&lt;5%</b>     |
|--------------------------------|-------------|-----------------|-----------------|----------------------|
| <b>Rank</b>                    | <b>Name</b> | <b>DNAScore</b> | <b>RNAScore</b> | <b>CombinedScore</b> |
| 1                              | AP2A1       | 2.899           | 3.016           | 5.687                |
| 4                              | NOP17       | 2.881           | 2.587           | 4.910                |
| 5                              | PRMT1       | 2.899           | 4.189           | 4.906                |
| 6                              | PSCD2       | 2.967           | 2.592           | 4.857                |
| 7                              | LPHN1       | 2.456           | 2.568           | 4.804                |
| 8                              | YWHAQ       | 2.506           | 2.435           | 4.801                |
| 9                              | CDC25B      | 2.779           | 3.883           | 4.769                |
| 10                             | RPS10       | 2.502           | 2.769           | 4.763                |
| 12                             | C19orf7     | 2.594           | 3.168           | 4.718                |
| 13                             | LENG4       | 2.410           | 2.528           | 4.708                |
| 14                             | ITPR3       | 2.502           | 2.945           | 4.628                |
| 15                             | ZNF76       | 2.502           | 2.358           | 4.579                |
| 16                             | ZBTB9       | 2.502           | 3.195           | 4.461                |
| 18                             | PSMF1       | 2.616           | 3.912           | 4.365                |
| 21                             | RNASEH1     | 2.207           | 2.306           | 4.318                |
| 22                             | ESRRA       | 2.139           | 2.170           | 4.249                |
| 23                             | SNRPB       | 2.481           | 3.521           | 4.230                |
| 24                             | WDR46       | 2.502           | 2.230           | 4.217                |
| 25                             | HSPC142     | 2.363           | 3.030           | 4.207                |

**B.**

| <b>Primaries High/Mets Low</b> |                |                 |                 | <b>FDR&lt;5%</b>     |
|--------------------------------|----------------|-----------------|-----------------|----------------------|
| <b>Rank</b>                    | <b>Name</b>    | <b>DNAScore</b> | <b>RNAScore</b> | <b>CombinedScore</b> |
| 2                              | <b>PRKD1</b>   | -2.673          | -2.708          | -5.312               |
| 3                              | LOC28550       | -2.620          | -2.666          | -5.194               |
| 11                             | <b>GUCY1A3</b> | -2.695          | -3.528          | -4.753               |
| 17                             | EDNRA          | -2.567          | -3.577          | -4.410               |
| 19                             | PPFIA2         | -2.303          | -2.624          | -4.325               |
| 20                             | PCDHGC3        | -2.305          | -2.634          | -4.321               |
